# Supplementary material for: An electrochemical aptasensor based on eATRP amplification for the detection of bisphenol A
Source: Royal Society of Chemistry journal article supplement (doi:10.1039/c9an01266d), 2019-01-01
Supplement: c9an01266d1.pdf [file c9an01266d1.pdf]

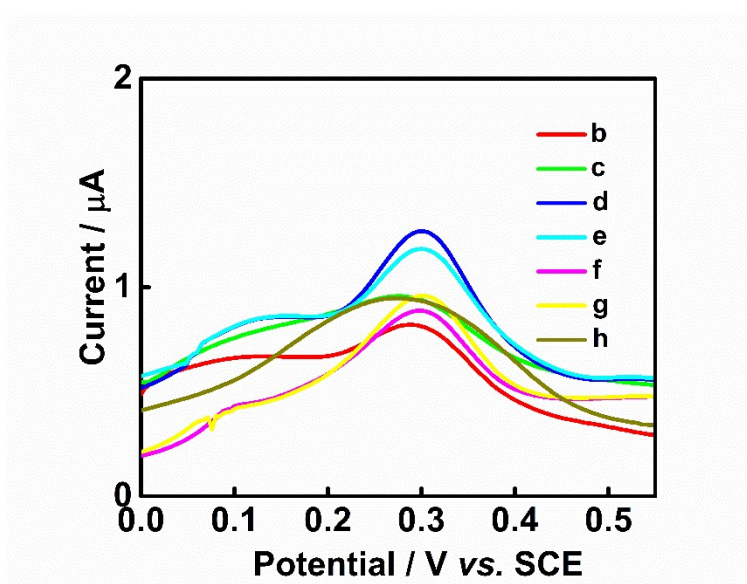

Fig. S1 DPV curves of the modified electrode prepared in the absence of hairpin DNA (b), BPA-aptamer-ssDNA-B (c),  $\text{CuSO}_4$  (d), AA (e),  $\text{CuBr}_2/\text{Me}_6\text{TREN}$  (f), PBIB (g) or FMMA (h) in 1 M  $\text{LiClO}_4$ .
